# Supplementary material
Source: PubMed Central journal article supplement (PMC6430198)

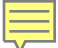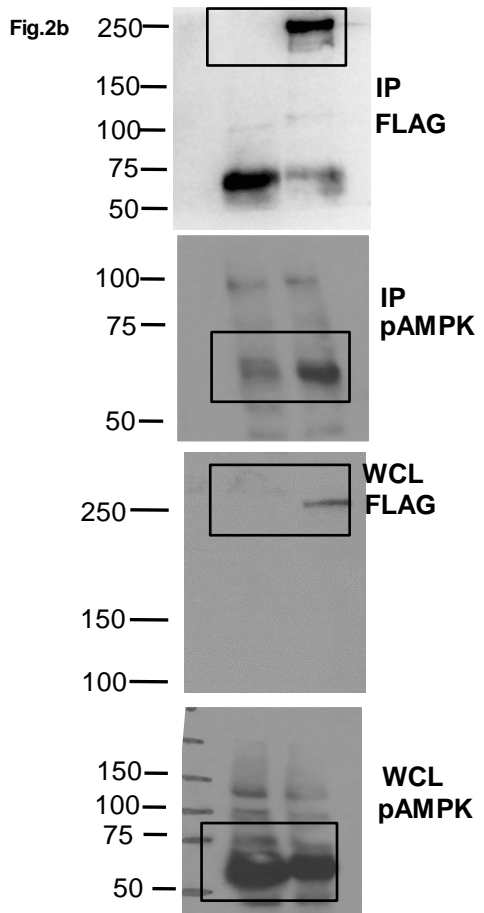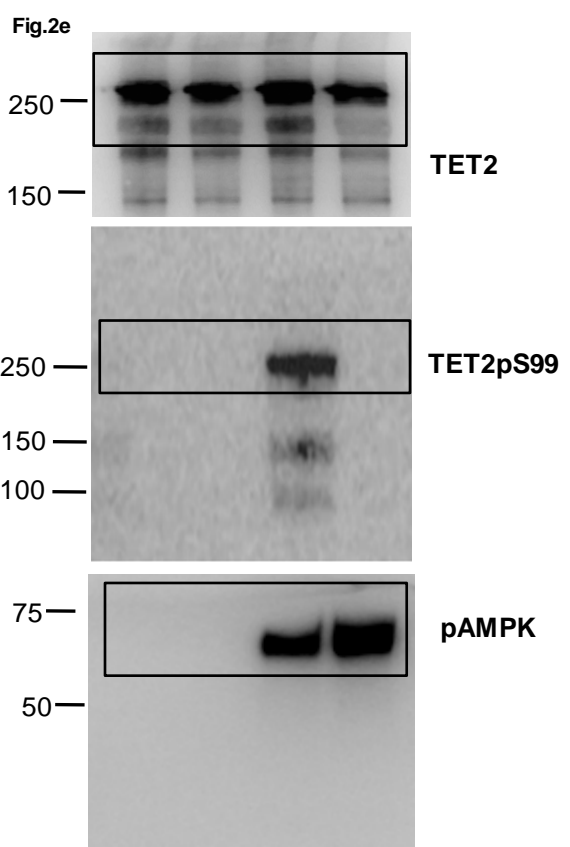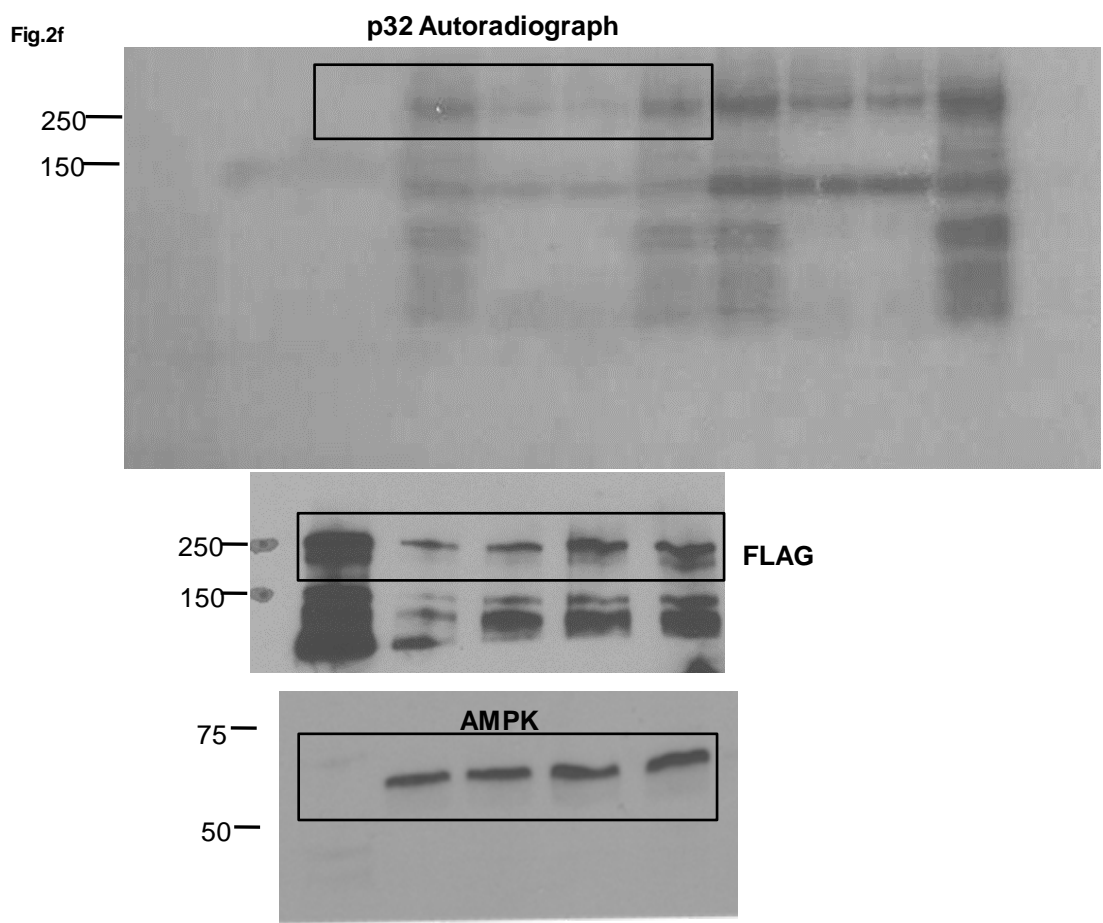

Fig.3a

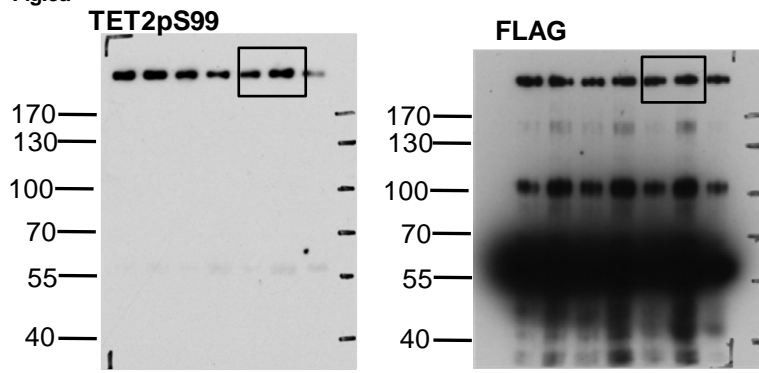

Fig.3d

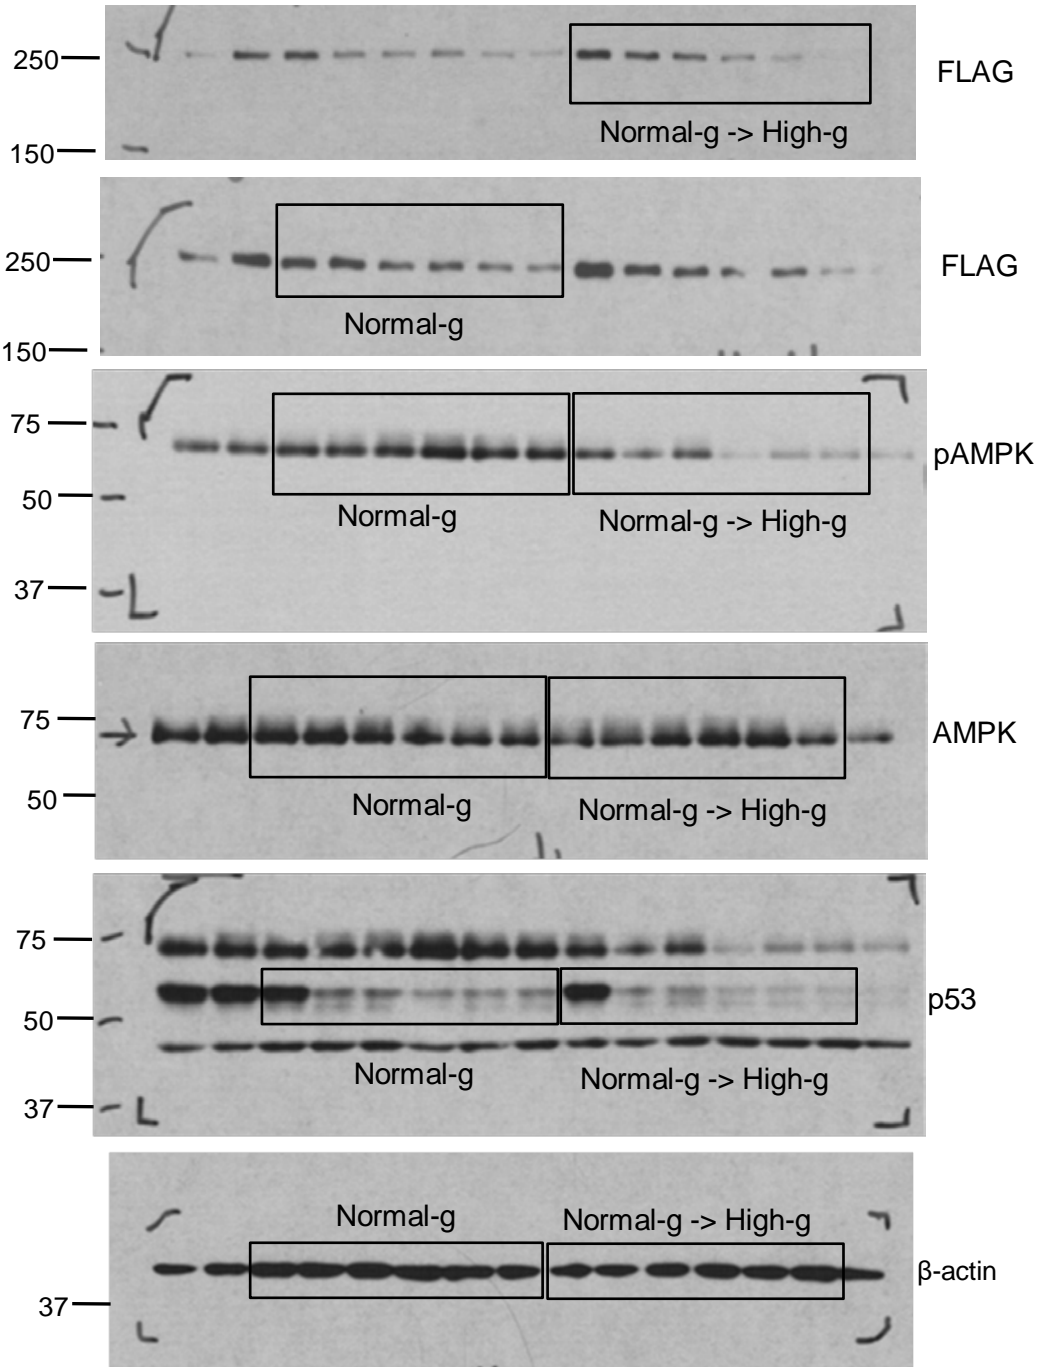

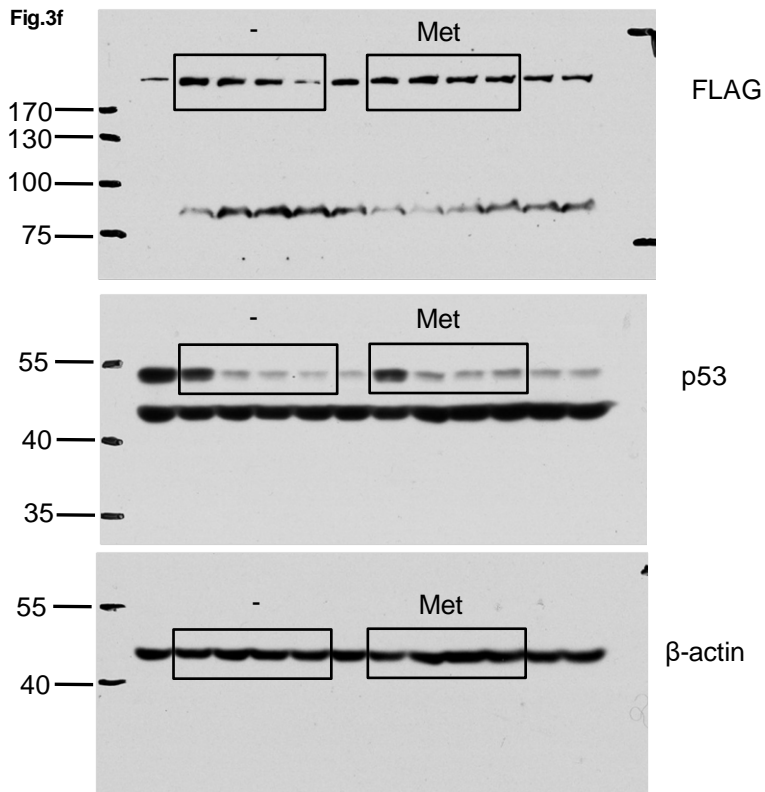

**Fig.3g**

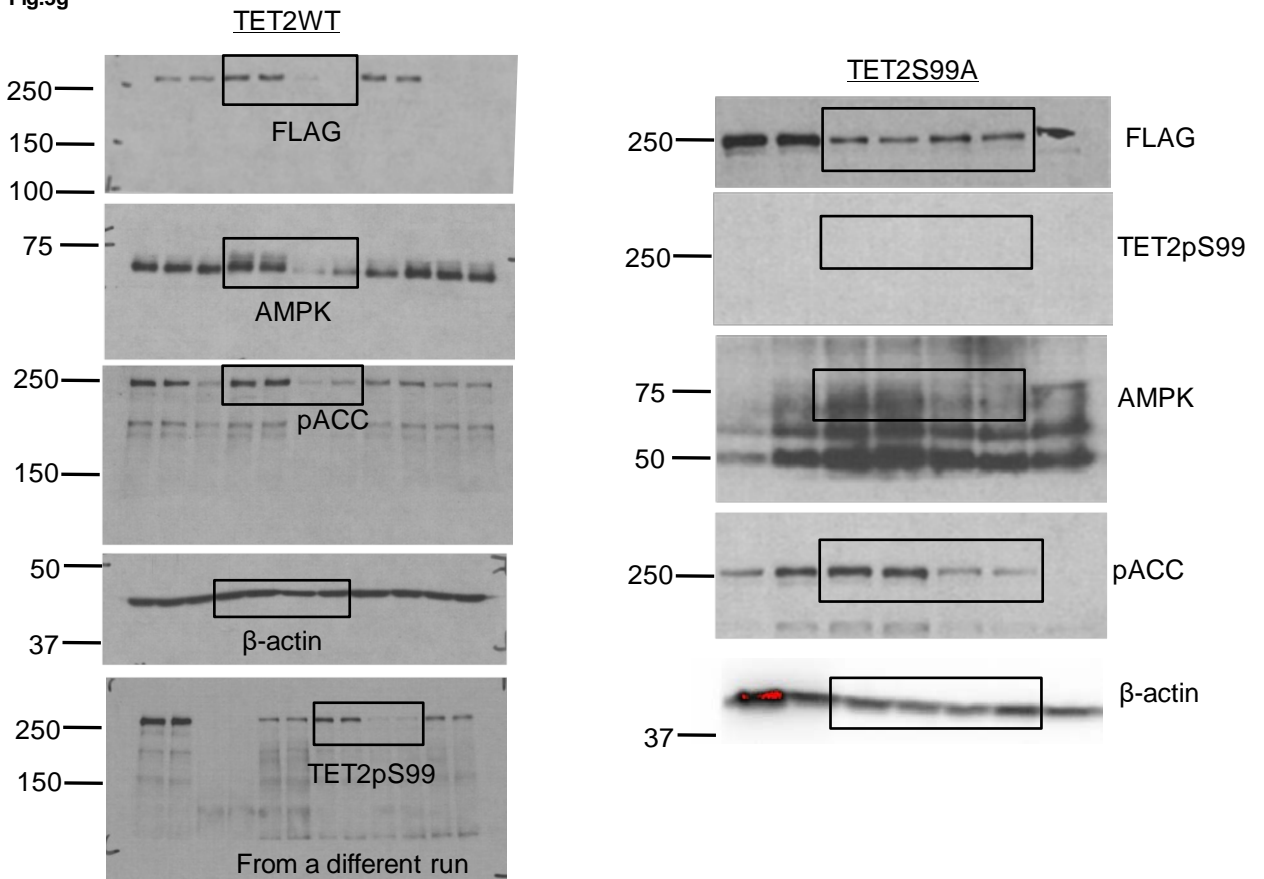

Fig.3h

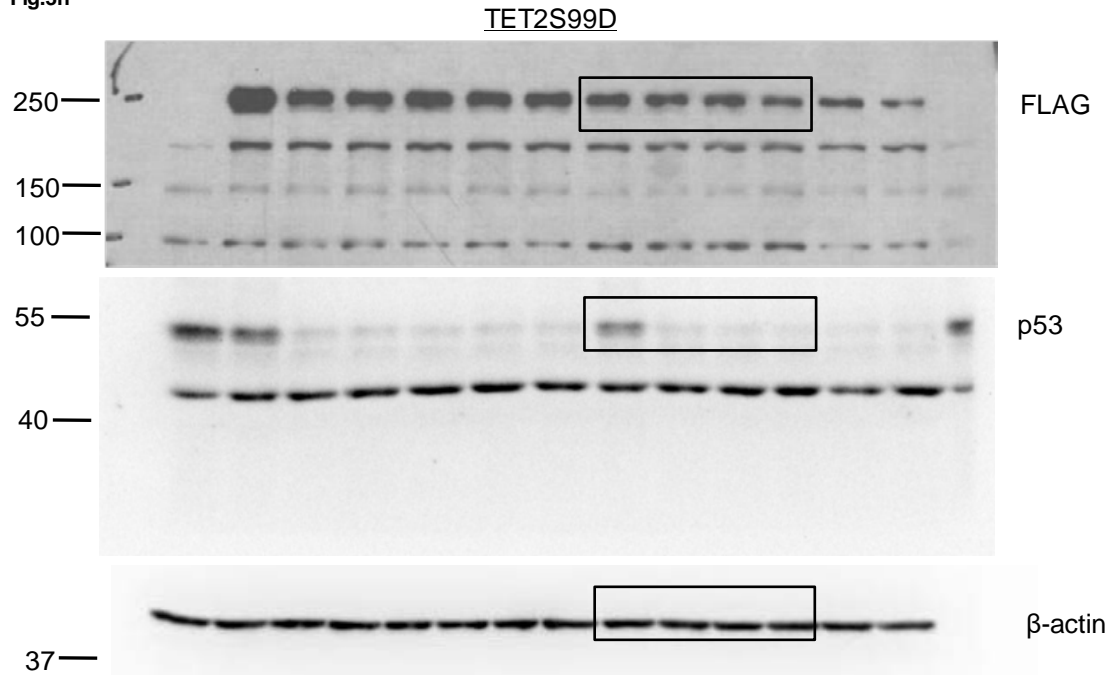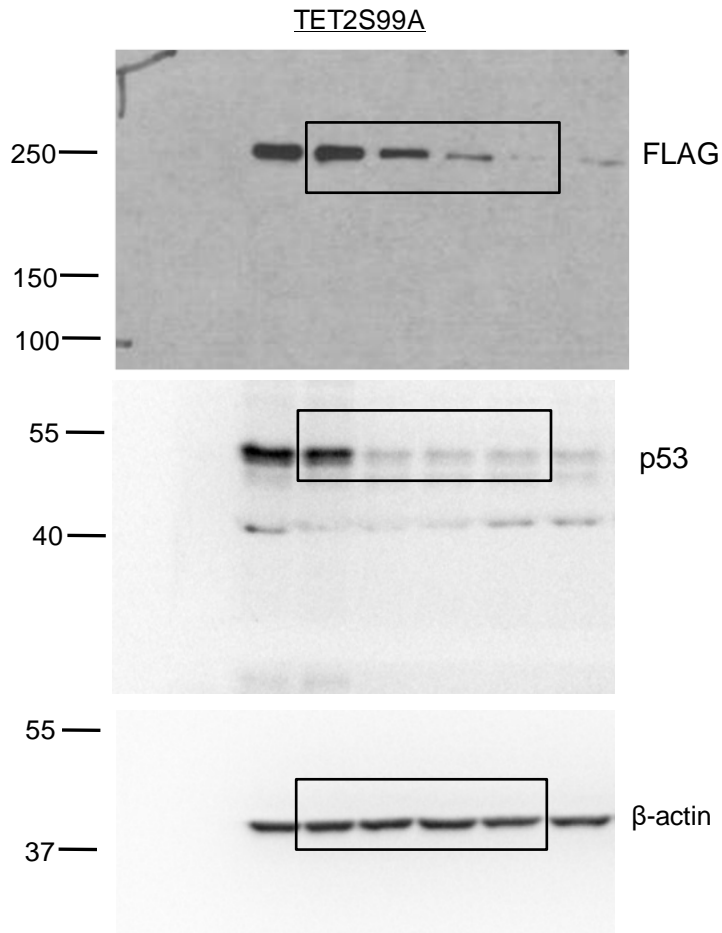

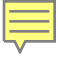

Ext Data Fig 1c

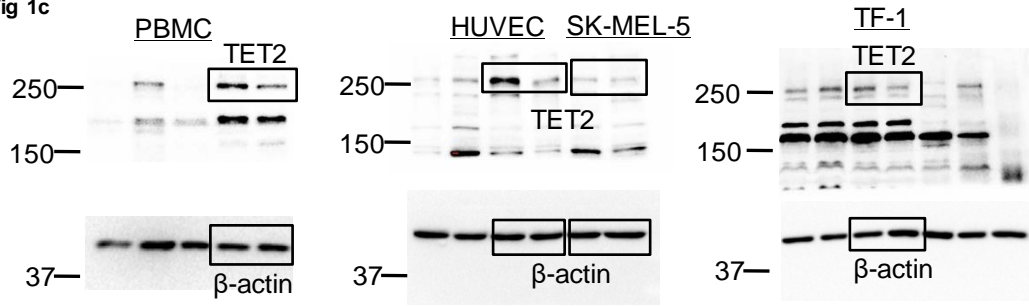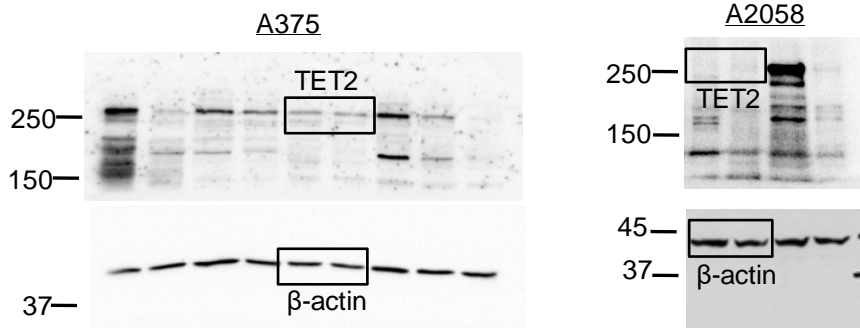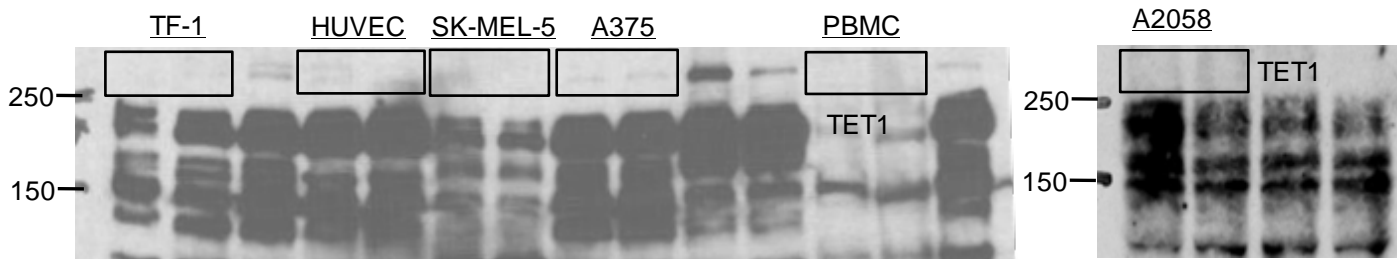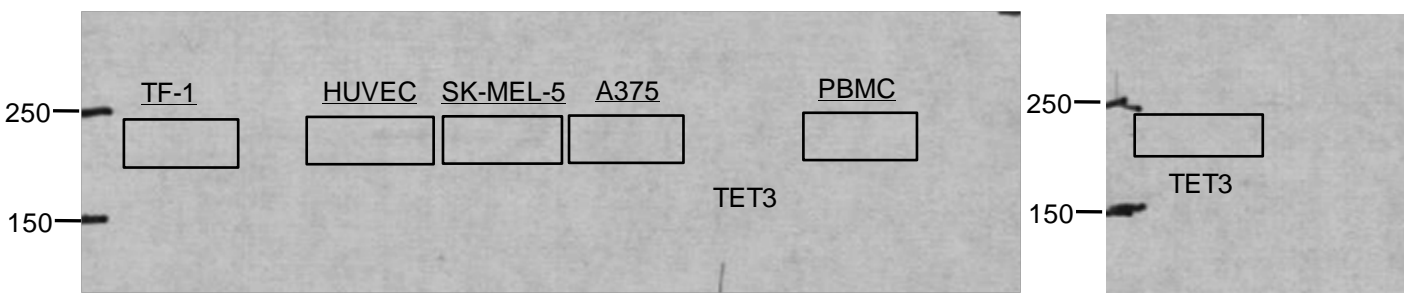



Ext Data Fig 1c

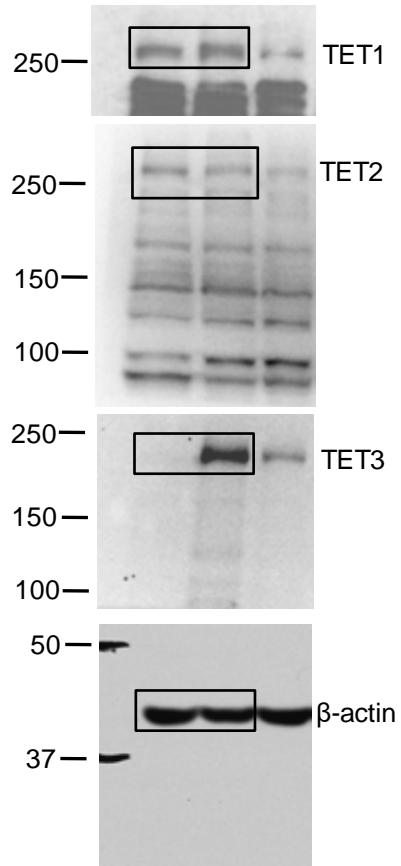

Ext Data Fig 1e

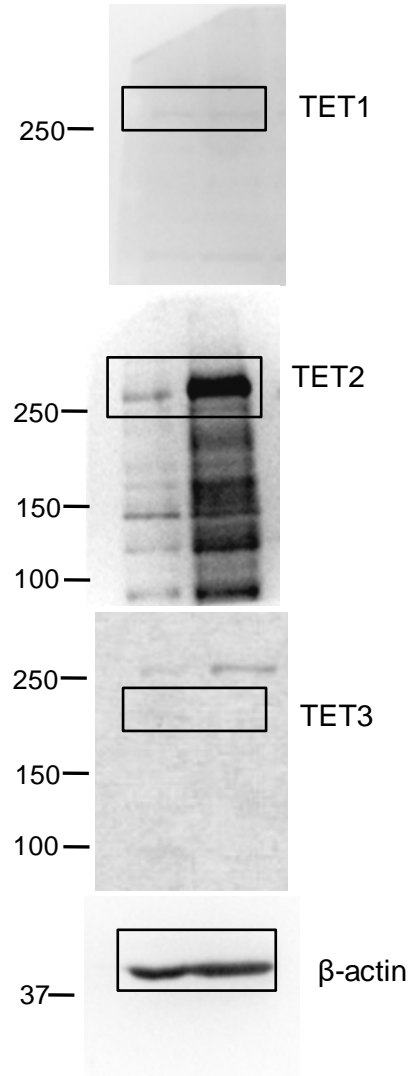

Ext Data Fig 1f

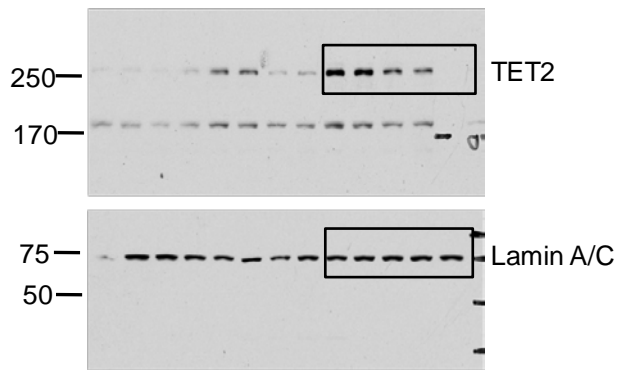

Ext Data Fig 1h

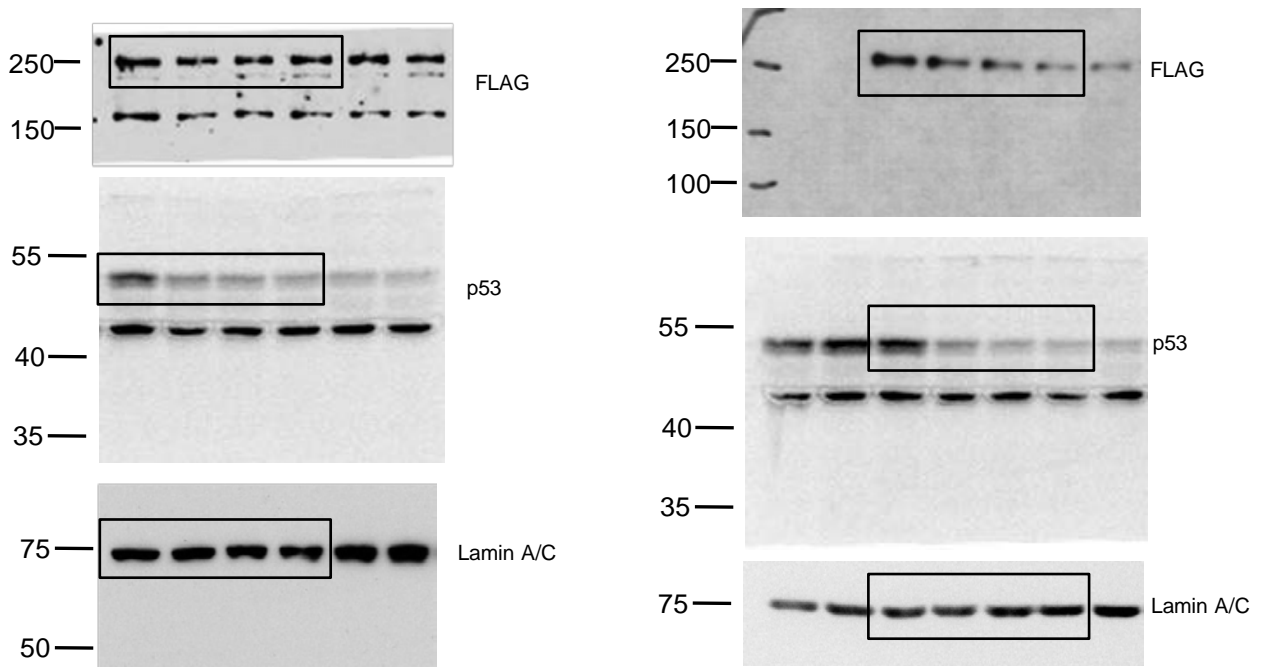



Ext Data Fig 5b

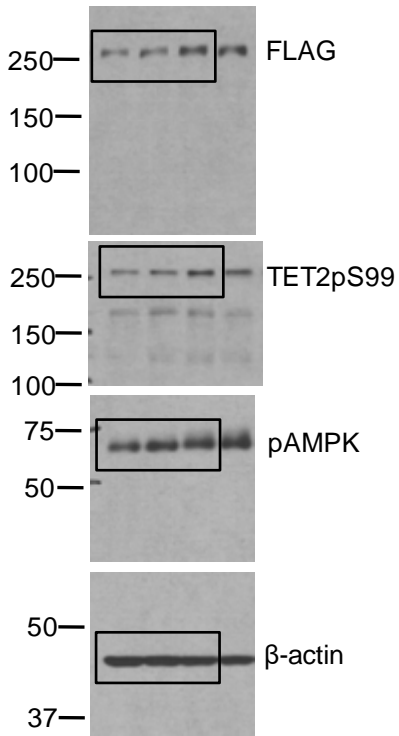

Ext Data Fig 5d

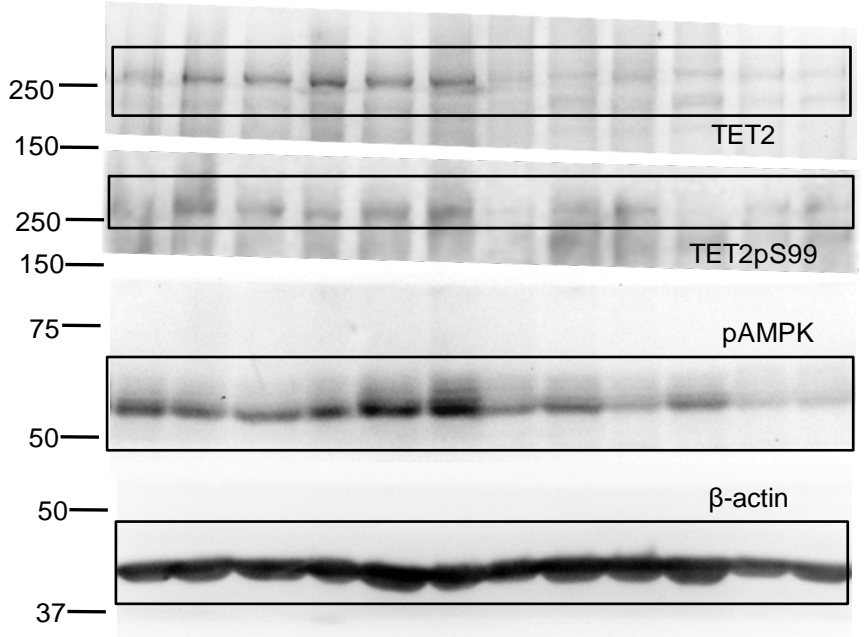

Ext Data Fig 5c

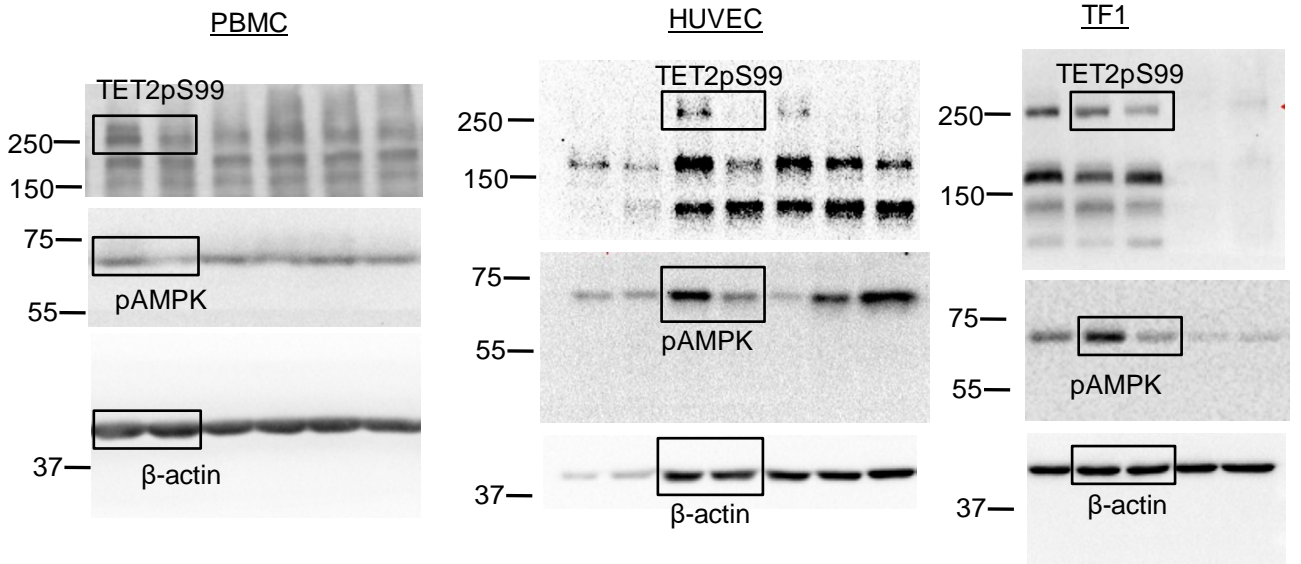





Ext Data Fig 6a

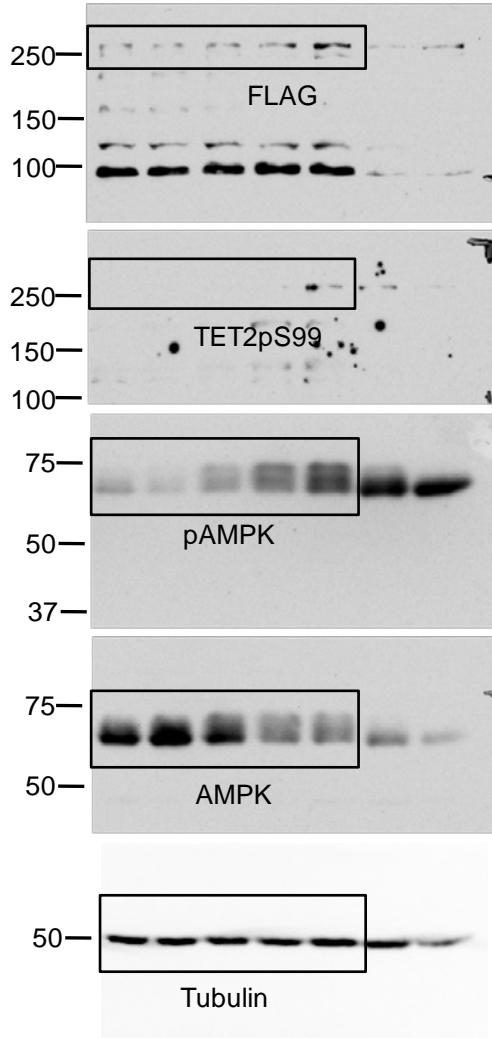

Ext Data Fig 6b

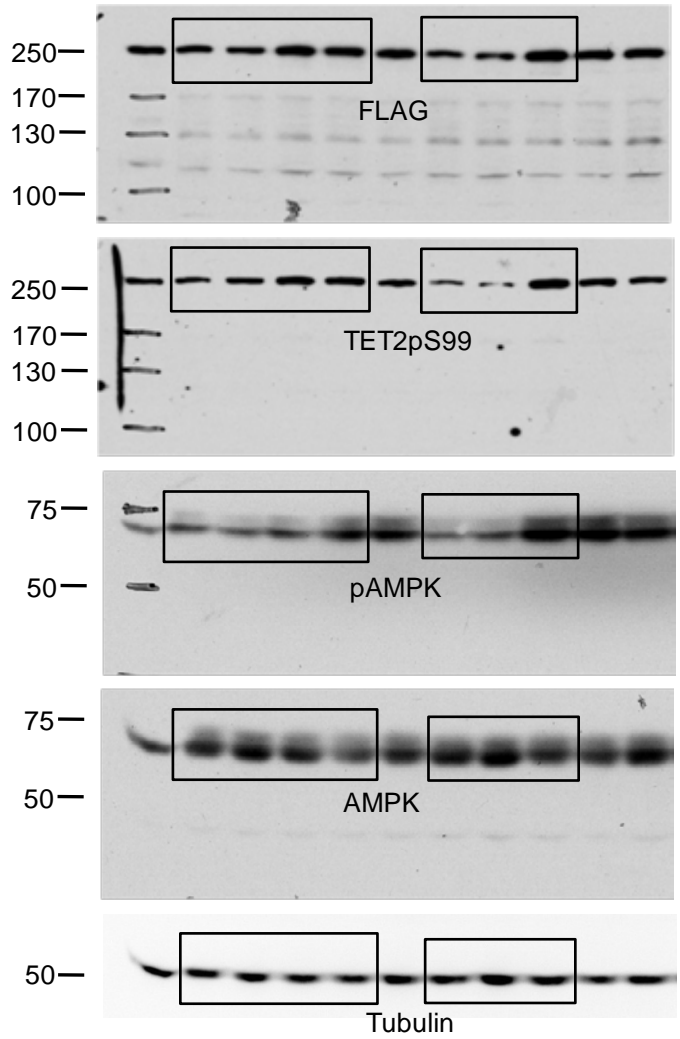

Ext Dat Fig 6d

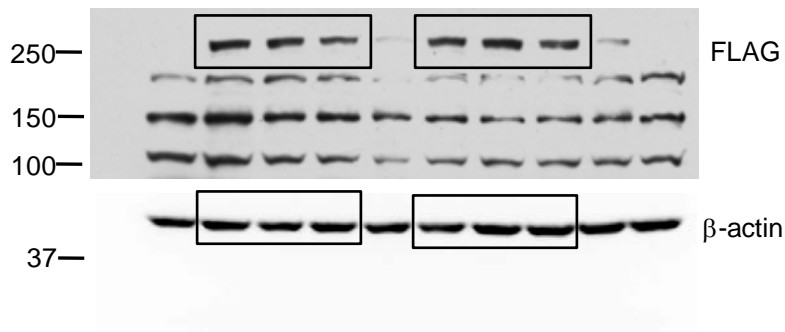



Ext Data Fig 7a

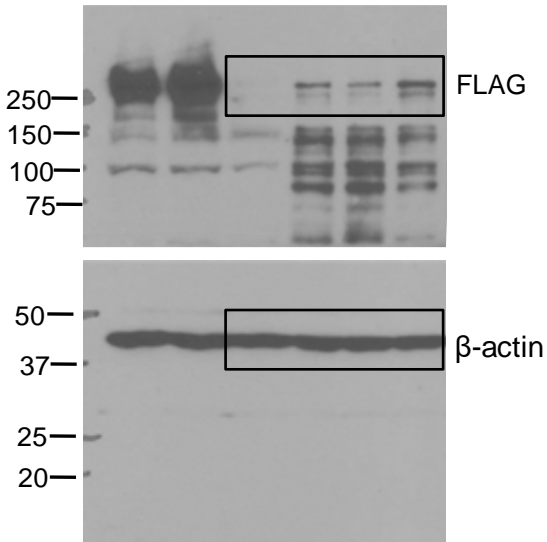

Ext Data Fig.8j

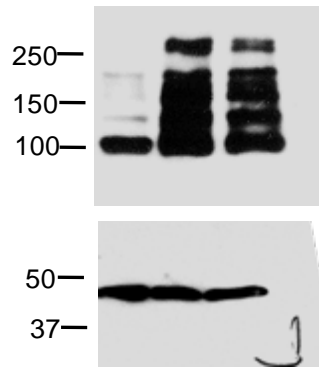

Ext Data Fig.7d

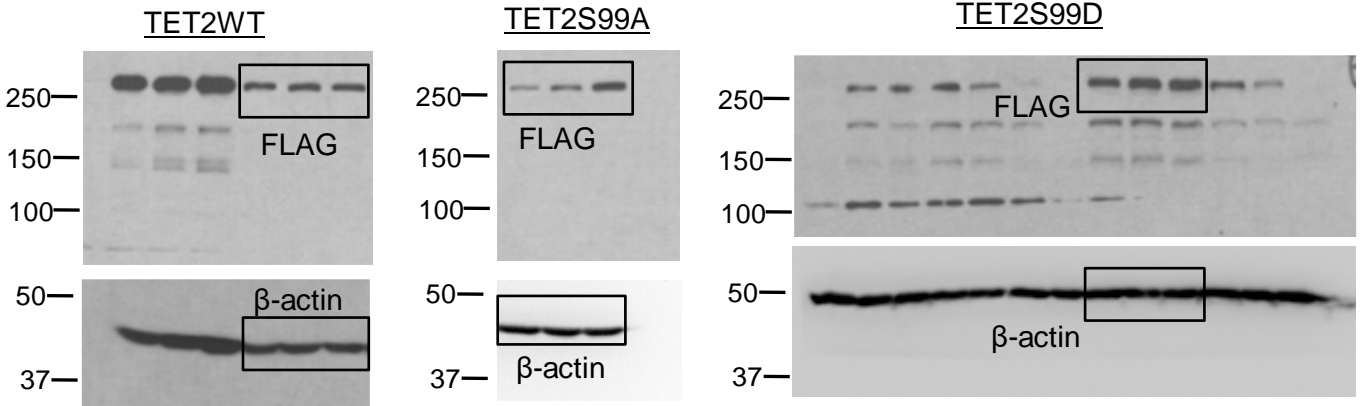

Ext Data Fig.8b

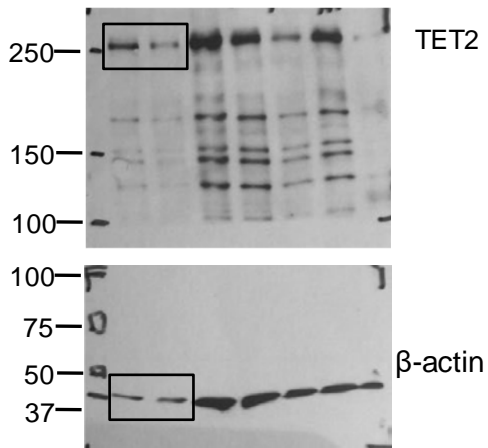

Ext Data Fig 9g

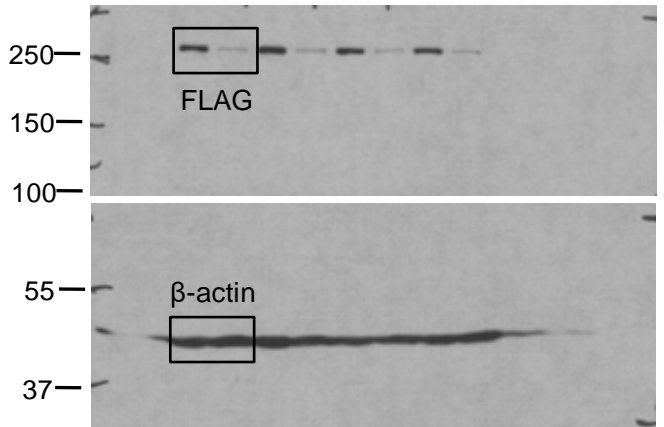

Supplement: NIHMS1012444-supplement-Supplemental_Figures.pdf [file NIHMS1012444-supplement-Supplemental_Figures.pdf]
